# Supplementary material for: Selectivity control in hydrogenation through adaptive catalysis using ruthenium nanoparticles on a CO2-responsive support
Source: Nat Chem. 2021 Jul 5;13(9):916–22. doi: 10.1038/s41557-021-00735-w (PMC8440215; doi:10.1038/s41557-021-00735-w)
Supplement: Supplementary file 3 [file 41557_2021_735_MOESM1_ESM.mol]

nchem.20081956C-comp1.mol
  ChemDraw05052121352D

 10 10  0  0  0  0  0  0  0  0999 V2000
   -1.0217   -1.0056    0.0000 C   0  0  0  0  0  0  0  0  0  0  0  0
   -0.7612   -0.2234    0.0000 C   0  0  0  0  0  0  0  0  0  0  0  0
   -1.4258    0.2662    0.0000 O   0  0  0  0  0  0  0  0  0  0  0  0
   -2.0965   -0.2143    0.0000 C   0  0  0  0  0  0  0  0  0  0  0  0
   -1.8467   -1.0003    0.0000 C   0  0  0  0  0  0  0  0  0  0  0  0
   -0.0447    0.1868    0.0000 C   0  0  0  0  0  0  0  0  0  0  0  0
    0.6680   -0.2288    0.0000 C   0  0  0  0  0  0  0  0  0  0  0  0
    1.3838    0.1807    0.0000 C   0  0  0  0  0  0  0  0  0  0  0  0
    2.0965   -0.2341    0.0000 C   0  0  0  0  0  0  0  0  0  0  0  0
    1.3868    1.0056    0.0000 O   0  0  0  0  0  0  0  0  0  0  0  0
  1  2  2  0      
  2  3  1  0      
  3  4  1  0      
  4  5  2  0      
  5  1  1  0      
  2  6  1  0      
  6  7  2  0      
  7  8  1  0      
  8  9  1  0      
  8 10  2  0      
M  END
