# Supplementary material for: Selectivity control in hydrogenation through adaptive catalysis using ruthenium nanoparticles on a CO2-responsive support
Source: Nat Chem. 2021 Jul 5;13(9):916–22. doi: 10.1038/s41557-021-00735-w (PMC8440215; doi:10.1038/s41557-021-00735-w)
Supplement: Supplementary file 13 [file 41557_2021_735_MOESM11_ESM.mol]

nchem.20081956C-comp6.mol
  ChemDraw05052121352D

  9  9  0  0  0  0  0  0  0  0999 V2000
   -1.7431    0.1940    0.0000 C   0  0  0  0  0  0  0  0  0  0  0  0
   -1.4956   -0.5928    0.0000 C   0  0  0  0  0  0  0  0  0  0  0  0
   -0.6707   -0.6004    0.0000 C   0  0  0  0  0  0  0  0  0  0  0  0
   -0.4079    0.1818    0.0000 C   0  0  0  0  0  0  0  0  0  0  0  0
   -1.0709    0.6730    0.0000 O   0  0  0  0  0  0  0  0  0  0  0  0
    0.3147    0.5790    0.0000 C   0  0  0  0  0  0  0  0  0  0  0  0
    1.0205    0.1520    0.0000 C   0  0  0  0  0  0  0  0  0  0  0  0
    1.7431    0.5492    0.0000 C   0  0  0  0  0  0  0  0  0  0  0  0
    1.0029   -0.6730    0.0000 O   0  0  0  0  0  0  0  0  0  0  0  0
  1  2  2  0      
  2  3  1  0      
  3  4  2  0      
  4  5  1  0      
  5  1  1  0      
  4  6  1  0      
  6  7  1  0      
  7  8  1  0      
  7  9  2  0      
M  END
